# Supplementary material
Source: ML conference proceedings conference paper supplement (https://openreview.net/forum?id=rwdpFgfVpvN)
Supplement: supplementary_material [file attachment]

## 407 A Auxiliary lemmas

408 The following lemma provides a useful upper bound on the optimal value of strongly convex function  
409 [28, 7, 25].

410 **Lemma 4** *Let  $\mathcal{X}$  be a convex set. Let  $h : \mathcal{X} \rightarrow \mathcal{R}$  be  $\alpha$ -strongly convex function on  $\mathcal{X}$  and  $x_{opt}$  be  
411 an optimal solution of  $h$ , i.e.,  $x_{opt} = \arg \min_{x \in \mathcal{X}} h(x)$ . Then,  $h(x_{opt}) \leq h(x) - \frac{\alpha}{2} \|x - x_{opt}\|^2$  for  
412 any  $x \in \mathcal{X}$ .*

413 **Proof** *The proof of the lemma is based on the definition of  $\alpha$ -strongly convex functions and the  
414 first-order optimality condition. Define the subgradient of  $h(x)$  to be  $\nabla h(x)$ , According to the  
415 definition of strong convexity, we have*

$$h(x) \geq h(y) + \langle \nabla h(y), x - y \rangle + \frac{\alpha}{2} \|x - y\|^2. \quad (10)$$

416 Define  $x_{opt} = \arg \min_{x \in \mathcal{X}} h(x)$ . Let  $y = x_{opt}$  in (10), we have

$$h(x) \geq h(x_{opt}) + \langle \nabla h(x_{opt}), x - x_{opt} \rangle + \frac{\alpha}{2} \|x - x_{opt}\|^2.$$

We then conclude the proof based on the first-order optimality condition that for any  $x \in \mathcal{X}$ ,

$$\langle \nabla h(x_{opt}), x - x_{opt} \rangle \geq 0.$$

417 The following lemma is the key to bridge the regret and the constraint violation.

418 **Lemma 5** *Define*

$$h_t(x) := \langle \nabla f_t(x_t), x - x_t \rangle + Q(t) \hat{g}_t^+(x) + \alpha_t \|x - x_t\|^2.$$

419 Let  $x_{t+1}$  be the optimal solution returned by RECOO, i.e.,  $x_{t+1} = \arg \min_{x \in \mathcal{X}} h_t(x)$ . We have for  
420 any  $x \in \mathcal{X}$  that

$$\begin{aligned} & \langle \nabla f_t(x_t), x_{t+1} - x_t \rangle + Q(t) \hat{g}_t^+(x_{t+1}) + \alpha_t \|x_{t+1} - x_t\|^2 \\ & \leq \langle \nabla f_t(x_t), x - x_t \rangle + Q(t) \hat{g}_t^+(x) + \alpha_t \|x - x_t\|^2 - \alpha_t \|x - x_{t+1}\|^2. \end{aligned} \quad (11)$$

421 **Proof** *The proof is a direct application of Lemma 4. Note that  $h_t(x)$  is  $2\alpha_t$ -strongly convex because  
422  $\langle \nabla f_t(x_t), x - x_t \rangle + Q(t) \hat{g}_t^+(x)$  is convex in  $x$  and  $\alpha_t \|x - x_t\|^2$  is  $2\alpha_t$ -strongly convex.*

423 The following lemma is to provide the detailed calculations required for obtaining inequality (8).

424 **Lemma 6** *Under Assumptions 1-3, we have*

$$\sum_{t=1}^T \frac{1}{t^{\frac{3}{2}+\varepsilon}} \leq 3, \quad \sum_{t=1}^T \frac{|f_t(x_t) - f_t(x^*)|}{t^{1+\varepsilon}} \leq FD \left(1 + \frac{1}{\varepsilon}\right), \quad \sum_{t=1}^T \frac{\|x_t - x^*\|^2 - \|x_{t+1} - x^*\|^2}{t^{\frac{1}{2}+\varepsilon}} \leq D^2.$$

425 **Proof** *Under Assumptions 1-3, we calculate these three terms as follows:*

$$\begin{aligned} \sum_{t=1}^T \frac{1}{t^{\frac{3}{2}+\varepsilon}} & \leq 1 + \int_1^T \frac{1}{t^{\frac{3}{2}+\varepsilon}} dt \leq 3, \\ \sum_{t=1}^T \frac{|f_t(x_t) - f_t(x^*)|}{t^{1+\varepsilon}} & \leq \sum_{t=1}^T \frac{FD}{t^{1+\varepsilon}} \leq FD + \int_1^T \frac{FD}{t^{1+\varepsilon}} dt \leq \frac{FD(1+\varepsilon)}{\varepsilon}, \\ \sum_{t=1}^T \frac{\|x_t - x^*\|^2 - \|x_{t+1} - x^*\|^2}{t^{\frac{1}{2}+\varepsilon}} & \leq D^2 + \sum_{t=2}^T \left( \frac{1}{t^{\frac{1}{2}+\varepsilon}} - \frac{1}{(t-1)^{\frac{1}{2}+\varepsilon}} \right) \|x_t - x^*\|^2 \leq D^2. \end{aligned}$$

## 426 B Proof of lemmas in Theorem 1

### 427 B.1 Proof of Lemma 1

428 We prove the key self-bounding property in this section. Since (11) holds for any  $x \in \mathcal{X}$  in Lemma 5,  
429 let  $x = x^*$  such that

$$\begin{aligned} & \langle \nabla f_t(x_t), x_{t+1} - x_t \rangle + Q(t) \hat{g}_t^+(x_{t+1}) + \alpha_t \|x_{t+1} - x_t\|^2 \\ & \leq \langle \nabla f_t(x_t), x^* - x_t \rangle + Q(t) \hat{g}_t^+(x^*) + \alpha_t \|x^* - x_t\|^2 - \alpha_t \|x^* - x_{t+1}\|^2. \end{aligned} \quad (12)$$

430 We add  $f_t(x_t)$  to both sides of (12) that

$$\begin{aligned}
& f_t(x_t) + \langle \nabla f_t(x_t), x_{t+1} - x_t \rangle + Q(t)\hat{g}_t^+(x_{t+1}) + \alpha_t \|x_{t+1} - x_t\|^2 \\
& \leq f_t(x_t) + \langle \nabla f_t(x_t), x^* - x_t \rangle + Q(t)\hat{g}_t^+(x^*) + \alpha_t \|x^* - x_t\|^2 - \alpha_t \|x^* - x_{t+1}\|^2 \\
& \leq f_t(x^*) + Q(t)\hat{g}_t^+(x^*) + \alpha_t \|x^* - x_t\|^2 - \alpha_t \|x^* - x_{t+1}\|^2 \\
& \leq f_t(x^*) + \alpha_t \|x^* - x_t\|^2 - \alpha_t \|x^* - x_{t+1}\|^2
\end{aligned} \tag{13}$$

431 where the second inequality holds because  $f_t(\cdot)$  is a convex function; the third inequality holds  
432 because  $x^*$  is an feasible point  $g_t(x^*) \leq 0$  such that  $\hat{g}_t^+(x^*) = 0$  holds.

433 By moving  $f_t(x^*)$  to the left-hand side and  $\alpha_t \|x_{t+1} - x_t\|^2$  to the right-hand side of (13), respectively,  
434 we have

$$\begin{aligned}
& f_t(x_t) - f_t(x^*) + Q(t)\hat{g}_t^+(x_{t+1}) \\
& \leq \langle \nabla f_t(x_t), x_t - x_{t+1} \rangle - \alpha_t \|x_{t+1} - x_t\|^2 + \alpha_t \|x^* - x_t\|^2 - \alpha_t \|x^* - x_{t+1}\|^2 \\
& \leq \frac{F^2}{4\alpha_t} + \alpha_t \|x^* - x_t\|^2 - \alpha_t \|x^* - x_{t+1}\|^2
\end{aligned}$$

435 where the last inequality holds by Assumption 2 that

$$\begin{aligned}
& \langle \nabla f_t(x_t), x_t - x_{t+1} \rangle - \alpha_t \|x_{t+1} - x_t\|^2 \\
& = \langle \nabla f_t(x_t), x_t - x_{t+1} \rangle - \alpha_t \|x_{t+1} - x_t\|^2 - \frac{\|\nabla f_t(x_t)\|^2}{4\alpha_t} + \frac{\|\nabla f_t(x_t)\|^2}{4\alpha_t} \\
& = - \left\| \frac{\nabla f_t(x_t)}{2\sqrt{\alpha_t}} - \sqrt{\alpha_t}(x_{t+1} - x_t) \right\|^2 + \frac{\|\nabla f_t(x_t)\|^2}{4\alpha_t} \\
& \leq \frac{\|\nabla f_t(x_t)\|^2}{4\alpha_t} \leq \frac{F^2}{4\alpha_t}.
\end{aligned}$$

## 436 B.2 Proof of Lemma 2

Since  $g_t(x)$  is convex function, we have  $g_t^+(x)$  to be convex because max over convex functions is convex. Denoting by  $\nabla g_t^+(x)$  the subgradient of  $g_t^+(x)$ , we have

$$g_t^+(x) \geq g_t^+(y) + \langle \nabla g_t^+(y), x - y \rangle.$$

437 Let  $y = x_t, x = x_{t+1}$ , we have

$$\begin{aligned}
g_t^+(x_t) - g_t^+(x_{t+1}) & \leq \langle \nabla g_t^+(x_t), x_t - x_{t+1} \rangle \\
& \leq \|\nabla g_t^+(x_t)\| \|x_t - x_{t+1}\| \\
& \leq G \|x_t - x_{t+1}\| - \frac{G^2}{4\beta} - \beta \|x_t - x_{t+1}\|^2 + \frac{G^2}{4\beta} + \beta \|x_t - x_{t+1}\|^2 \\
& \leq \frac{G^2}{4\beta} + \beta \|x_t - x_{t+1}\|^2
\end{aligned}$$

438 where the second inequality holds because of Cauchy-Schwarz inequality; the third inequality holds  
439 because of Assumption 3. Take summation of the equality above from 1 to  $T$ , we have

$$\sum_{t=1}^T (g_t^+(x_t) - g_t^+(x_{t+1})) \leq \frac{TG^2}{4\beta} + \beta \sum_{t=1}^T \|x_t - x_{t+1}\|^2.$$

## 440 B.3 Proof of Lemma 3

441 According to Lemma 5, we have

$$\begin{aligned}
& f_t(x_t) + \langle \nabla f_t(x_t), x_{t+1} - x_t \rangle + Q(t)\hat{g}_t^+(x_{t+1}) + \alpha_t \|x_{t+1} - x_t\|^2 \\
& \leq f_t(x_t) + \langle \nabla f_t(x_t), x^* - x_t \rangle + Q(t)\hat{g}_t^+(x^*) + \alpha_t \|x^* - x_t\|^2 - \alpha_t \|x^* - x_{t+1}\|^2 \\
& \leq f_t(x^*) + Q(t)\hat{g}_t^+(x^*) + \alpha_t \|x^* - x_t\|^2 - \alpha_t \|x^* - x_{t+1}\|^2
\end{aligned}$$

where the last inequality holds because of the convexity of  $f_t(\cdot)$ . By  $g_t^+(x_{t+1}) \geq 0$  and  $g_t^+(x^*) = 0$ , we rearrange the inequality above and have

$$\|x_{t+1} - x_t\|^2 \leq \frac{1}{\alpha_t}(f_t(x^*) - f_t(x_t)) + \frac{1}{\alpha_t}\langle \nabla f_t(x_t), x_t - x_{t+1} \rangle + \|x^* - x_t\|^2 - \|x^* - x_{t+1}\|^2$$

Take summation of the inequality above from  $t = 1$  to  $T$ , we have

$$\begin{aligned} & \sum_{t=1}^T \|x_{t+1} - x_t\|^2 \\ & \leq \sum_{t=1}^T \frac{1}{\alpha_t}(f_t(x^*) - f_t(x_t)) + \sum_{t=1}^T \frac{1}{\alpha_t}\langle \nabla f_t(x_t), x_t - x_{t+1} \rangle + \sum_{t=1}^T (\|x^* - x_t\|^2 - \|x^* - x_{t+1}\|^2) \\ & \leq \sum_{t=1}^T \frac{2FD}{\alpha_t} + \|x^* - x_1\|^2 \\ & \leq 4FD\sqrt{T} + D^2 \end{aligned}$$

where the second inequality holds because

$$f_t(x) - f_t(y) \leq \langle \nabla f_t(x), x - y \rangle \leq \|\nabla f_t(x)\| \|x - y\| \leq FD;$$

the last inequality holds because of  $\alpha_t = \sqrt{t}$  and Assumption 1. The proof is completed.

## C Corollary 1

**Corollary 1** Under Assumptions 1-3, let the learning rates be  $\alpha_t = t^c, \eta_t = t^c, \gamma_t = t^{c+\varepsilon}, \forall t \in [T]$ , where  $c \in [1/2, 1)$  and  $\varepsilon > 0$ . RECOO algorithm achieves the following bounds on the regret and cumulative constraint violations:

$$\begin{aligned} \mathcal{R}(T) & \leq \left( \frac{F^2}{4(1-c)} + D^2 \right) T^c, \text{ for both types of constraints,} \\ \mathcal{V}(T) & \leq F^2 + FD + \frac{FD}{\varepsilon} + D^2 \text{ for fixed constraints, and} \\ \mathcal{V}(T) & \leq \left( F^2 + \frac{G^2}{4} + FD \left( 1 + \frac{2}{1-c} + \frac{1}{\varepsilon} \right) + 2D^2 \right) T^{1-c/2} \text{ for adversarial constraints.} \end{aligned}$$

451

The proof of corollary follows almost the same steps as in Theorem 1 where  $c = 1/2$ . Based on (5) in Lemma 1, we still have

$$f_t(x_t) - f_t(x^*) \leq \frac{F^2}{4\alpha_t} + \alpha_t \|x^* - x_t\|^2 - \alpha_t \|x^* - x_{t+1}\|^2, \quad (14)$$

$$Q(t)\hat{g}_t^+(x_{t+1}) \leq \frac{F^2}{4\alpha_t} + |f_t(x_t) - f_t(x^*)| + \alpha_t \|x^* - x_t\|^2 - \alpha_t \|x^* - x_{t+1}\|^2, \quad (15)$$

which is used to establish the bounds of regret and violation.

**Regret Bound:** we take summation of the inequality (14) from  $t = 1, \dots, T$  and have

$$\begin{aligned} \sum_{t=1}^T (f_t(x_t) - f_t(x^*)) & \leq \frac{F^2}{4} \sum_{t=1}^T \frac{1}{\alpha_t} + \sum_{t=1}^T (\alpha_t - \alpha_{t-1}) \|x^* - x_t\|^2 \\ & \leq \frac{F^2}{4} \sum_{t=1}^T \frac{1}{\alpha_t} + D^2 \sum_{t=1}^T (\alpha_t - \alpha_{t-1}) \end{aligned}$$

where the last inequality holds by Assumption 1. Choose  $\alpha_t = t^c$ , we have

$$\sum_{t=1}^T \frac{1}{\alpha_t} = \sum_{t=1}^T t^{-c} \leq \frac{T^{1-c}}{1-c}, \quad \sum_{t=1}^T (\alpha_t - \alpha_{t-1}) = \sum_{t=1}^T (t^c - (t-1)^c) \leq T^c$$

457 It implies that

$$\sum_{t=1}^T (f_t(x_t) - f_t(x^*)) \leq \left( \frac{F^2}{4(1-c)} + D^2 \right) T^{\max\{c, 1-c\}},$$

458 which gives the regret bound with  $O(T^{\max\{c, 1-c\}})$ .

459 **Cumulative constraint violation bound:** For constraint violation, we still have (15) and

$$g_t^+(x_{t+1}) \leq \frac{F^2}{4Q(t)\alpha_t\gamma_t} + \frac{|f_t(x_t) - f_t(x^*)|}{Q(t)\gamma_t} + \frac{\alpha_t}{Q(t)\gamma_t} \|x_t - x^*\|^2 - \frac{\alpha_t}{Q(t)\gamma_t} \|x_{t+1} - x^*\|^2,$$

460 Set  $\gamma_t = t^c$  and  $\eta_t = t^{c+\varepsilon}$ , where  $c \in [1/2, 1)$  and  $\varepsilon > 0$ , this implies that

$$\sum_{t=1}^T g_t^+(x_{t+1}) \leq \sum_{t=1}^T \frac{F^2}{4t^{3c+\varepsilon}} + \sum_{t=1}^T \frac{|f_t(x_t) - f_t(x^*)|}{t^{2c+\varepsilon}} + \sum_{t=1}^T \frac{\|x_t - x^*\|^2 - \|x_{t+1} - x^*\|^2}{t^{c+\varepsilon}}$$

461 By Lemma 6, we establish

$$\sum_{t=1}^T g_t^+(x_{t+1}) \leq F^2 + FD + \frac{FD}{\varepsilon} + D^2, \quad (16)$$

462 which proves  $\mathcal{V}(T) := \sum_{t=1}^T g^+(x_t) \leq F^2 + FD + \frac{FD}{\varepsilon} + D^2$ . Let's continue with (16) to prove the  
 463 second part of Corollary 1 for the adversarial constraints. Recall Lemma 2 that under Assumptions  
 464 1-3, RECOO achieves for any  $\beta > 0$

$$g_t^+(x_t) - g_t^+(x_{t+1}) \leq \frac{G^2}{4\beta} + \beta \|x_t - x_{t+1}\|^2.$$

465 From Lemma 2, it is required to quantify the stability term  $\|x_t - x_{t+1}\|^2$  that is established in the  
 466 following lemma.

467 **Lemma 7** Under Assumptions 1-3, let the learning rates be  $\alpha_t = t^c, \eta_t = t^c, \gamma_t = t^{c+\varepsilon}, \forall t \in [T]$ ,  
 468 where  $c \in [1/2, 1)$  and  $\varepsilon > 0$ . RECOO achieves

$$\sum_{t=1}^T \|x_{t+1} - x_t\|^2 \leq \frac{2FD}{1-c} T^{1-c} + D^2.$$

469 **Proof** From Lemma 5, we still have:

$$\begin{aligned} & f_t(x_t) + \langle \nabla f_t(x_t), x_{t+1} - x_t \rangle + Q(t)\hat{g}_t^+(x_{t+1}) + \alpha_t \|x_{t+1} - x_t\|^2 \\ & \leq f_t(x_t) + \langle \nabla f_t(x_t), x^* - x_t \rangle + Q(t)\hat{g}_t^+(x^*) + \alpha_t \|x^* - x_t\|^2 - \alpha_t \|x^* - x_{t+1}\|^2 \\ & \leq f_t(x^*) + Q(t)\hat{g}_t^+(x^*) + \alpha_t \|x^* - x_t\|^2 - \alpha_t \|x^* - x_{t+1}\|^2 \end{aligned}$$

470 According to  $g_t^+(x_{t+1}) \geq 0$  and  $g_t^+(x^*) = 0$  and rearrange the inequality, we have

$$\begin{aligned} & \|x_{t+1} - x_t\|^2 \\ & \leq \frac{1}{\alpha_t} (f_t(x^*) - f_t(x_t)) + \frac{1}{\alpha_t} \langle \nabla f_t(x_t), x_t - x_{t+1} \rangle + \|x^* - x_t\|^2 - \|x^* - x_{t+1}\|^2. \end{aligned}$$

Take summation of the inequality above, we have

$$\sum_{t=1}^T \|x_{t+1} - x_t\|^2 \leq \sum_{t=1}^T \frac{1}{\alpha_t} (f_t(x^*) - f_t(x_t)) + \sum_{t=1}^T \frac{1}{\alpha_t} \langle \nabla f_t(x_t), x_t - x_{t+1} \rangle + \sum_{t=1}^T (\|x^* - x_t\|^2 - \|x^* - x_{t+1}\|^2).$$

471 Since  $\alpha_t = t^c$ , we have:

$$\begin{aligned} \sum_{t=1}^T \frac{1}{\alpha_t} (f_t(x^*) - f_t(x_t) + \langle \nabla f_t(x_t), x_t - x_{t+1} \rangle) & \leq 2FD \sum_{t=1}^T t^{-c} \leq \frac{2FD}{1-c} T^{1-c}, \\ \sum_{t=1}^T (\|x^* - x_t\|^2 - \|x^* - x_{t+1}\|^2) & \leq D^2, \end{aligned}$$

472 which proves Lemma 7.

473 Recall in Lemma 2 and we have

$$\begin{aligned} \sum_{t=1}^T g_t^+(x_t) &= \sum_{t=1}^T g_{t+1}^+(x_t) + \sum_{t=1}^T g_t^+(x_t) - \sum_{t=1}^T g_{t+1}^+(x_t) \\ &\leq \left( F^2 + FD + \frac{FD}{\varepsilon} + D^2 \right) + \frac{G^2 T}{4\beta} + \beta \left( D^2 + \frac{2FD}{1-c} T^{1-c} \right). \end{aligned}$$

474 Let  $\beta = T^{c/2}$ , we establish

$$\mathcal{V}(T) := \sum_{t=1}^T g_t^+(x_t) \leq \left( F^2 + \frac{G^2}{4} + FD \left( 1 + \frac{2}{1-c} + \frac{1}{\varepsilon} \right) + 2D^2 \right) T^{1-c/2},$$

475 which proves the corollary.

## 476 D Proof of Theorem 2

477 In this section, we prove Theorem 2 which considers strongly convex loss functions. According to  
478 the definition of  $\mu$ -strongly convex, we have

$$f_t(x_t) + \langle \nabla f_t(x_t), x^* - x_t \rangle \leq f(x^*) - \frac{\mu}{2} \|x^* - x_t\|^2 \quad (17)$$

479 We start with inequality (12) by using Lemma 5:

$$\begin{aligned} &f_t(x_t) + \langle \nabla f_t(x_t), x_{t+1} - x_t \rangle + Q(t) \hat{g}_t^+(x_{t+1}) + \alpha_t \|x_{t+1} - x_t\|^2 \\ &\leq f_t(x_t) + \langle \nabla f_t(x_t), x^* - x_t \rangle + Q(t) \hat{g}_t^+(x^*) + \alpha_t \|x^* - x_t\|^2 - \alpha_t \|x^* - x_{t+1}\|^2 \\ &\leq f_t(x^*) - \frac{\mu}{2} \|x^* - x_t\|^2 + \alpha_t \|x^* - x_t\|^2 - \alpha_t \|x^* - x_{t+1}\|^2 \end{aligned} \quad (18)$$

480 where the last inequality holds according to the strongly convex condition of  $f_t(\cdot)$  in (17). By  
481 following the same steps that lead to inequality (5), we have

$$\begin{aligned} &f_t(x_t) - f_t(x^*) + Q(t) \hat{g}_t^+(x^*) \\ &\leq \frac{F^2}{4\alpha_t} - \frac{\mu}{2} \|x^* - x_t\|^2 + \alpha_t \|x^* - x_t\|^2 - \alpha_t \|x^* - x_{t+1}\|^2. \end{aligned} \quad (19)$$

482 This is the key “self-bounding” property when  $f_t(\cdot)$  is strongly convex function, from which we  
483 obtain

$$\begin{aligned} f_t(x_t) - f_t(x^*) &\leq \frac{F^2}{4\alpha_t} - \frac{\mu}{2} \|x^* - x_t\|^2 + \alpha_t \|x^* - x_t\|^2 - \alpha_t \|x^* - x_{t+1}\|^2, \\ Q(t) \hat{g}_t^+(x_{t+1}) &\leq \frac{F^2}{4\alpha_t} + |f_t(x_t) - f_t(x^*)| - \frac{\mu}{2} \|x^* - x_t\|^2 + \alpha_t \|x^* - x_t\|^2 - \alpha_t \|x^* - x_{t+1}\|^2. \end{aligned} \quad (20)$$

484 Recall that  $\alpha_t = \frac{\mu t}{2}$ ,  $\eta_t = \sqrt{t}$ , and  $\gamma_t = t^{\frac{1}{2}+\varepsilon}$ ,  $\varepsilon > 0$ . We next establish the regret and violation  
485 bounds.

486 **Regret bound:** From (20), we immediately have

$$\begin{aligned} \sum_{t=1}^T f_t(x_t) - f_t(x^*) &\leq \frac{F^2}{4} \sum_{t=1}^T \frac{1}{\alpha_t} + \sum_{t=1}^T \left( \alpha_t - \alpha_{t-1} - \frac{\mu}{2} \right) \|x_t - x^*\|^2 \\ &\leq \frac{F^2}{4} \sum_{t=1}^T \frac{1}{\alpha_t} + D^2 \sum_{t=1}^T \left( \alpha_t - \alpha_{t-1} - \frac{\mu}{2} \right) \end{aligned}$$

487 By the choice of  $\alpha_t = \frac{\mu t}{2}$ , we have

$$\sum_{t=1}^T f_t(x_t) - f_t(x^*) \leq \frac{F^2}{2\mu} (1 + \log T).$$

488 Following the same steps as in the proof of Theorem 1, we establish

$$\sum_{t=1}^T g_t^+(x_{t+1}) \leq \frac{F^2}{2\mu} \sum_{t=1}^T \frac{1}{t^{2+\varepsilon}} + \sum_{t=1}^T \frac{|f_t(x_t) - f_t(x^*)|}{t^{1+\varepsilon}} \quad (22)$$

489 which implies that

$$\sum_{t=1}^T g_t^+(x_{t+1}) \leq \frac{F^2}{\mu} + FD \left(1 + \frac{1}{\varepsilon}\right). \quad (23)$$

#### 490 **D.1 Violation bound: fixed constraints**

491 For fixed constraints, inequality (23) implies  $\mathcal{V}(T) := \sum_{t=1}^T g^+(x_t) \leq \frac{F^2}{\mu} + FD \left(1 + \frac{1}{\varepsilon}\right)$  because  
 492 the constraint is fixed. We have proved the first part of Theorem 2 for the fixed constraints. Let's  
 493 continue with (23) to prove the second part of Theorem 2 for the adversarial constraints.

#### 494 **D.2 Violation bound: adversarial constraints**

495 By Lemma 2, we have

$$\sum_{t=1}^T (g_t^+(x_t) - g_t^+(x_{t+1})) \leq \frac{TG^2}{4\beta} + \beta \sum_{t=1}^T \|x_t - x_{t+1}\|^2. \quad (24)$$

496 From (18), we again establish the bound on  $\sum_{t=1}^T \|x_t - x_{t+1}\|^2$  as follows

$$\begin{aligned} & \sum_{t=1}^T \|x_t - x_{t+1}\|^2 \\ & \leq \sum_{t=1}^T \frac{1}{\alpha_t} (f_t(x^*) - f_t(x_t) + \langle \nabla f_t(x_t), x_t - x_{t+1} \rangle) + \sum_{t=1}^T (\|x^* - x_t\|^2 - \|x^* - x_{t+1}\|^2) \\ & \leq \sum_{t=1}^T \frac{2FD}{\alpha_t} + \|x^* - x_1\|^2 \\ & \leq \frac{4FD}{\mu} (1 + \log T) + D^2, \end{aligned} \quad (25)$$

497 where the second inequality holds because

$$f_t(x) - f_t(y) \leq \langle \nabla f_t(x), x - y \rangle \leq \|\nabla f_t(x)\| \|x - y\| \leq FD, \forall x, y \in \mathcal{X};$$

498 the last inequality holds because of  $\alpha_t = \frac{\mu t}{2}$  and Assumption 1. We combine (24) and (25) with  
 499  $\beta = \sqrt{T/(1 + \log T)}$  as follows

$$\begin{aligned} \sum_{t=1}^T (g_t^+(x_t) - g_t^+(x_{t+1})) & \leq \frac{TG^2}{4\beta} + \beta \sum_{t=1}^T \|x_t - x_{t+1}\|^2 \\ & \leq \frac{TG^2}{4\beta} + \beta \left( \frac{4FD}{\mu} (1 + \log T) + D^2 \right) \\ & = \left( \frac{G^2}{4} + \frac{4FD}{\mu} \right) \sqrt{T(1 + \log T)} + D^2 \sqrt{T/(1 + \log T)}. \end{aligned}$$

500 Combining the inequality above with inequality (23), we establish the second part of Theorem 2 for  
 501 adversarial constraints.

## E Proof of Theorem 3

We prove Theorem 3 with a dynamic baseline similar to that in [26], which is the solution to the following offline OCO with constraints:

$$\min_{x_t \in \mathcal{X}} \sum_{t=1}^T f_t(x_t) \quad (26)$$

$$\text{subject to: } g_t(x_t) \leq 0, \forall t \in [T], \quad (27)$$

$$\sum_{t=1}^T \|x_{t+1} - x_t\| \leq P_T. \quad (28)$$

where (28) imposes a path-length constraint on the baseline solution which limits change of  $\{x_t\}$ . Note that the solution to (26)-(28) with  $P_T = 0$  reduces to the best fixed decision in hindsight. Let  $\{x_t^*\}$  be the optimal solution to (26)-(28). We define the regret and cumulative constraint violation as follows

$$\mathcal{R}^{\text{dynamic}}(T) := \sum_{t=1}^T f_t(x_t) - \sum_{t=1}^T f_t(x_t^*), \quad (29)$$

$$\mathcal{V}(T) := \sum_{t=1}^T g_t^+(x_t). \quad (30)$$

Next, we state the key self-bounding property for establishing Theorem 3.

**Lemma 8** *Let  $\{x_t\}$  be the decision sequence generated by RECOO. Under Assumptions 1-3, the following inequality holds for any sequence  $\{y_t\}$  with  $y_t \in \mathcal{X}, \forall t$ ,*

$$\begin{aligned} & f_t(x_t) - f_t(y_t) + Q(t)\hat{g}_t^+(x_{t+1}) \\ & \leq \frac{F^2}{4\alpha_t} + Q(t)\hat{g}_t^+(y_t) + \alpha_t\|y_t - x_t\|^2 - \alpha_t\|y_t - x_{t+1}\|^2. \end{aligned} \quad (31)$$

**Proof** According to Lemma 5, we have

$$\begin{aligned} & \langle \nabla f_t(x_t), x_{t+1} - x_t \rangle + Q(t)\hat{g}_t^+(x_{t+1}) + \alpha_t\|x_{t+1} - x_t\|^2 \\ & \leq \langle \nabla f_t(x_t), y_t - x_t \rangle + Q(t)\hat{g}_t^+(y_t) + \alpha_t\|y_t - x_t\|^2 - \alpha_t\|y_t - x_{t+1}\|^2. \end{aligned}$$

We add  $f_t(x_t)$  to both sides of the inequality above

$$\begin{aligned} & f_t(x_t) + \langle \nabla f_t(x_t), x_{t+1} - x_t \rangle + Q(t)\hat{g}_t^+(x_{t+1}) + \alpha_t\|x_{t+1} - x_t\|^2 \\ & \leq f_t(x_t) + \langle \nabla f_t(x_t), y_t - x_t \rangle + Q(t)\hat{g}_t^+(y_t) + \alpha_t\|y_t - x_t\|^2 - \alpha_t\|y_t - x_{t+1}\|^2 \\ & \leq f_t(y_t) + Q(t)\hat{g}_t^+(y_t) + \alpha_t\|y_t - x_t\|^2 - \alpha_t\|y_t - x_{t+1}\|^2, \end{aligned}$$

which proves the lemma because

$$\langle \nabla f_t(x_t), x_t - x_{t+1} \rangle - \alpha_t\|x_{t+1} - x_t\|^2 \leq \frac{\|\nabla f_t(x_t)\|^2}{4\alpha_t} \leq \frac{F^2}{4\alpha_t}.$$

**Regret bound with dynamic baseline:** Let the optimal sequence be  $\{x_t^*\}$ . Substitute  $\{y_t\} = \{x_t^*\}$  in (31). By  $g_t(x_t^*) \leq 0$ , we have

$$\begin{aligned} & f_t(x_t) - f_t(x_t^*) + Q(t)\hat{g}_t^+(x_{t+1}) \\ & \leq \frac{F^2}{4\alpha_t} + \alpha_t\|x_t^* - x_t\|^2 - \alpha_t\|x_t^* - x_{t+1}\|^2. \end{aligned}$$

Take the summation of the inequality above from  $t = 1$  to  $T$ , we have

$$\mathcal{R}^{\text{dynamic}}(T) \leq \sum_{t=1}^T \frac{F^2}{4\alpha_t} + \sum_{t=1}^T \alpha_t (\|x_t^* - x_t\|^2 - \|x_t^* - x_{t+1}\|^2) \quad (32)$$

518 Recall  $\alpha_t = \sqrt{t}$ , we have

$$\sum_{t=1}^T \frac{F^2}{4\alpha_t} \leq \frac{F^2\sqrt{T}}{2}.$$

519 For the second term, we have

$$\begin{aligned} & \sum_{t=1}^T \alpha_t (\|x_t^* - x_t\|^2 - \|x_t^* - x_{t+1}\|^2) \\ &= \sum_{t=1}^T \sqrt{t} (\|x_t^* - x_t\|^2 - \|x_t^* - x_{t+1}\|^2) \\ &= \sum_{t=1}^T \sqrt{t} \|x_t^* - x_t\|^2 - \sqrt{t+1} \|x_{t+1}^* - x_{t+1}\|^2 + \sqrt{t+1} \|x_{t+1}^* - x_{t+1}\|^2 \\ &\quad - \sqrt{t} \|x_{t+1}^* - x_{t+1}\|^2 + \sqrt{t} \|x_{t+1}^* - x_{t+1}\|^2 - \sqrt{t} \|x_t^* - x_{t+1}\|^2 \\ &\leq \|x_1^* - x_1\|^2 + \sum_{t=1}^T (\sqrt{t+1} - \sqrt{t}) D^2 + \sum_{t=1}^T \sqrt{t} (\|x_{t+1}^* - x_{t+1}\|^2 - \|x_t^* - x_{t+1}\|^2) \\ &\leq D^2 \sqrt{T+1} + 2DP_T \sqrt{T}, \end{aligned}$$

520 where the first inequality holds because of Assumption 1 and the last inequality holds because

$$\begin{aligned} \sum_{t=1}^T |\|x_{t+1}^* - x_{t+1}\|^2 - \|x_t^* - x_{t+1}\|^2| &= \sum_{t=1}^T |\langle x_{t+1}^* - x_t^*, x_{t+1}^* - x_{t+1} + x_t^* - x_{t+1} \rangle| \\ &\leq \sum_{t=1}^T \|x_{t+1}^* - x_t^*\| (\|x_{t+1}^* - x_{t+1}\| + \|x_t^* - x_{t+1}\|) \\ &\leq 2D \sum_{t=1}^T \|x_{t+1}^* - x_t^*\|. \end{aligned}$$

521 Therefore, we prove the regret in Theorem 3 as follows

$$\mathcal{R}(T) \leq \frac{F^2\sqrt{T}}{2} + (D^2 + 2DP_T)\sqrt{T+1} \leq \left( \frac{F^2}{2} + D^2 + 2DP_T \right) \sqrt{T+1}.$$

522 **Cumulative hard constraint violation bound:** When  $\alpha_t = \eta_t = \sqrt{t}$ ,  $\gamma_t = t^{\frac{1}{2}+\varepsilon}$  with  $\varepsilon > 0$ , the  
523 proof follows the same steps in the proof of Theorem 1 in Section 3.1 because the definition of  
524 constraint violation is the same.

## 525 F Refined results of RECOO with expert-tracking under the dynamic 526 baseline

527 Motivated by [33], we combine RECOO with expert tracking techniques in [6] to improve the  
528 performance bounds w.r.t.  $P_T$ , similar in [26]. The intuition of the algorithm is to set up  $N$  parallel  
529 experts ( $N$  RECOO algorithms) and to track the best one. We state RECOO with expert tracking  
530 algorithm as follows.

---

### 531 A Rectified Online Optimization with Expert-Tracking Algorithm

---

532 **Initialization ( $N$  Experts):**  $f_0(x) = g_0(x) = 0$ ,  $\forall x \in \mathcal{X}$ ,  $x_{i,0} \in \mathcal{X}$ ,  $Q_i(0) = 0$ . The learning rates  
533  $\alpha_{i,t}$ ,  $\eta_{i,t}$ ,  $\gamma_t$ ,  $\kappa$  and  $w_{i,1} = \frac{N+1}{i(i+1)N}$ ,  $\forall i \in [N]$ .

534 For  $t = 1, \dots, T$ ,



535 • **Set:**  $\hat{g}_{t-1}^+(x) = \gamma_{t-1}g_{t-1}^+(x)$ .

536 • **Rectified decision:** find the optimal solution of  $x_{i,t}$  for each expert and output  $x_t$  :

$$x_{i,t} = \arg \min_{x \in \mathcal{X}} \langle \nabla f_{t-1}(x_{i,t-1}), x - x_{i,t-1} \rangle + Q_i(t-1)\hat{g}_{t-1}^+(x) + \alpha_{i,t-1}\|x - x_{i,t-1}\|^2$$

$$x_t = \sum_{i=1}^N w_{i,t}x_{i,t}$$

537 • **Observe:**  $\nabla f_t(\cdot)$  and  $g_t(\cdot)$ .

538 • **Rectified penalty update:** update  $Q_i(t)$  and  $w_{i,t}$  as follows:

$$Q_i(t) = \max(Q_i(t-1) + \hat{g}_t^+(x_t), \eta_{i,t}).$$

$$l_t(x) = \langle \nabla f_t(x_t), x - x_t \rangle$$

$$w_{i,t+1} = \frac{w_{i,t}e^{-\kappa l_t(x_{i,t})}}{\sum_{i=1}^N w_{i,t}e^{-\kappa l_t(x_{i,t})}}$$

539 Before presenting the main result of RECOO with expert-tracking algorithm, we impose an additional  
540 assumption on the loss functions as in [33].

541 **Assumption 5** *The loss functions are bounded by a constant  $C$  such that  $|f_t(x)| \leq C, \forall x \in \mathcal{X}, \forall t$ .*

542 We are ready to show RECOO with expert-tracking algorithm improves Theorem 3 in the following.

543 **Corollary 2** *Let  $N = \lfloor \frac{1}{2} \log_2(1+T) \rfloor + 1$ ,  $\kappa = 1/\sqrt{T}$ . Let the learning rates be  $\alpha_{i,t} =$   
544  $\sqrt{t}/2^{i-1}$ ,  $\eta_{i,t} = 2^{i-1}\sqrt{t}$ ,  $\gamma_t = t^{\frac{1}{2}+\varepsilon}$ ,  $\forall i \in [N]$ , where  $\varepsilon > 0$ . Let  $\{x_t^*\}$  be the optimal solution  
545 to (2) with  $P_T = \sum_{t=1}^{T-1} \|x_{t+1}^* - x_t^*\|$ . Under Assumptions 1-3, RECOO with expert-tracking algo-  
546 rithm achieves the following bounds on the regret and cumulative constraint violations:*

$$\mathcal{R}^{\text{dynamic}}(T) \leq \left[ (2F^2 + 4D^2)\sqrt{1 + \frac{P_T}{D}} + \frac{C^2}{2} + 2 \ln \left( \left\lfloor \frac{1}{2} \log_2 \left( 1 + \frac{P_T}{D} \right) \right\rfloor + 2 \right) \right] \sqrt{T+1},$$

$$\mathcal{V}(T) \leq 2FD \left( 1 + \frac{1}{\varepsilon} \right) + F^2(1 + \log(1+T)) + 2D^2.$$

547

548 We first introduce Lemma 1 in [33], which quantifies the difference between the weighted output of  
549 all experts with the best expert.

550 **Lemma 9 (Lemma 1 in [33])** *Let  $\{x_{i,t}\}$  and  $\{x_t\}$  be the sequence generated by RECOO with expert-  
551 tracking algorithm, we have*

$$\sum_{t=1}^T l_t(x_t) - \min_{i \in [N]} \left\{ \sum_{t=1}^T l_t(x_{i,t}) + \frac{1}{\kappa} \ln \frac{1}{w_{i,1}} \right\} \leq \frac{\kappa C^2 T}{2}.$$

552 Substitute the learning rate of  $\alpha_{i,t}$  in (32) in the proof of Theorem 3, we have

$$\sum_{t=1}^T (f_t(x_{i,t}) - f_t(x_t^*)) + \sum_{t=1}^T Q_i(t)\hat{g}_t^+(x_{i,t+1}) \leq 2^i F^2 \sqrt{T} + \frac{D^2 \sqrt{T+1}}{2^{i-1}} + \frac{2DP_T \sqrt{T}}{2^{i-1}}. \quad (33)$$

553 Recall  $N = \lfloor \frac{1}{2} \log_2(1+T) \rfloor + 1$ , there exists  $i_0 = \lfloor \frac{1}{2} \log_2(1 + \frac{P_T}{D}) \rfloor + 1 \in [N]$  such that

$$2^{i_0-1} \leq \sqrt{1 + \frac{P_T}{D}} \leq 2^{i_0}. \quad (34)$$

554 **Regret bound with dynamic baseline:** Let  $i = i_0$  in (33) and by Lemma 9, we have:

$$\begin{aligned}
\sum_{t=1}^T (f_t(x_{i_0,t}) - f_t(x_t^*)) &\leq 2^{i_0} F^2 \sqrt{T} + \frac{D^2 \sqrt{T+1}}{2^{i_0-1}} + \frac{2DP_T \sqrt{T}}{2^{i_0-1}} \\
&\leq 2F^2 \sqrt{T \left(1 + \frac{P_T}{D}\right)} + \frac{D^2 \sqrt{T+1} + 2DP_T \sqrt{T}}{2^{i_0-1}} \\
&\leq 2F^2 \sqrt{T \left(1 + \frac{P_T}{D}\right)} + \frac{4}{2^{i_0}} \left( D^2 \sqrt{T+1} \left(1 + \frac{P_T}{D}\right) \right) \\
&\leq (2F^2 + 4D^2) \sqrt{(T+1) \left(1 + \frac{P_T}{D}\right)}
\end{aligned}$$

555 where the second and the last inequalities hold by using (34). Moreover, we have

$$\sum_{t=1}^T f_t(x_t) - \sum_{t=1}^T f_t(x_{i_0,t}) \leq \sum_{t=1}^T l_t(x_t) - \sum_{t=1}^T l_t(x_{i_0,t}) \leq \frac{\kappa C^2 T}{2} + \frac{1}{\kappa} \ln \frac{1}{w_{i_0,1}}$$

556 where the first inequality holds by the convexity of  $f_t(\cdot)$  and the second inequality holds by Lemma  
557 9. Recall  $\kappa = \frac{1}{\sqrt{T}}$  and  $w_{i,1} = \frac{N+1}{i(i+1)N}$ , we have

$$\ln \frac{1}{w_{i_0,1}} \leq \ln(i_0(i_0 + 1)) \leq 2 \ln(i_0 + 1) \leq 2 \ln \left( \left\lfloor \frac{1}{2} \log_2 \left( 1 + \frac{P_T}{D} \right) \right\rfloor + 2 \right).$$

558 Combine all these inequalities, we have:

$$\begin{aligned}
\mathcal{R}(T) &= \sum_{t=1}^T f_t(x_t) - \sum_{t=1}^T f_t(x_{i_0,t}) + \sum_{t=1}^T f_t(x_{i_0,t}) - \sum_{t=1}^T f_t(x_t^*) \\
&\leq (2F^2 + 4D^2) \sqrt{(T+1) \left(1 + \frac{P_T}{D}\right)} + \left( \frac{C^2}{2} + 2 \ln \left( \left\lfloor \frac{1}{2} \log_2 \left( 1 + \frac{P_T}{D} \right) \right\rfloor + 2 \right) \right) \sqrt{T}
\end{aligned}$$

559 which proves the regret in Corollary 2 and establish  $O(\sqrt{P_T T})$  regret bound.

560 **Violation bound:** Since  $g_t^+(x)$  is convex, we have:

$$\sum_{t=1}^T g_t^+(x_{t+1}) = \sum_{t=1}^T g_t^+ \left( \sum_{i=1}^N w_{i,t+1} x_{i,t+1} \right) \leq \sum_{i=1}^N \sum_{t=1}^T w_{i,t+1} g_t^+(x_{i,t+1}) \leq \sum_{i=1}^N \sum_{t=1}^T g_t^+(x_{i,t+1}).$$

By the inequality (31), we have

$$Q_i(t) \hat{g}_t^+(x_{i,t+1}) \leq f_t(x_t^*) - f_t(x_{i,t}) + \frac{F^2}{4\alpha_t} + \alpha_{i,t} \|x_t^* - x_{i,t}\|^2 - \alpha_{i,t} \|x_t^* - x_{i,t+1}\|^2.$$

561 Let  $\alpha_{i,t} = \sqrt{t}/2^{i-1}$ ,  $\eta_{i,t} = 2^{i-1}\sqrt{t}$ ,  $\gamma_t = t^{\frac{1}{2}+\varepsilon}$ ,  $\varepsilon > 0$ , we have

$$\begin{aligned}
g_t^+(x_{i,t+1}) &\leq \frac{|f_t(x_t^*) - f_t(x_{i,t})|}{\eta_{i,t} \gamma_t} + \frac{F^2}{4\alpha_{i,t} \eta_{i,t} \gamma_t} + \frac{\alpha_{i,t}}{\eta_{i,t} \gamma_t} (\|x_t^* - x_{i,t}\|^2 - \|x_t^* - x_{i,t+1}\|^2) \\
&\leq \frac{1}{2^{i-1}} \frac{FD}{t^{1+\varepsilon}} + \frac{F^2}{4t^{\frac{3}{2}+\varepsilon}} + \frac{1}{4^{i-1}} \frac{1}{t^{\frac{1}{2}+\varepsilon}} (\|x_t^* - x_{i,t}\|^2 - \|x_t^* - x_{i,t+1}\|^2),
\end{aligned}$$

562 which implies

$$\begin{aligned}
\sum_{t=1}^T g_t^+(x_{i,t+1}) &\leq \frac{1}{2^{i-1}} \sum_{t=1}^T \frac{FD}{t^{1+\varepsilon}} + \sum_{t=1}^T \frac{F^2}{4t^{\frac{3}{2}+\varepsilon}} + \frac{1}{4^{i-1}} \sum_{t=1}^T \frac{1}{t^{\frac{1}{2}+\varepsilon}} (\|x_t^* - x_{i,t}\|^2 - \|x_t^* - x_{i,t+1}\|^2) \\
&\leq \frac{FD}{2^{i-1}} \left( 1 + \frac{1}{\varepsilon} \right) + F^2 + \frac{D^2}{4^{i-1}}
\end{aligned}$$

563 Thus we have

$$\begin{aligned}
\sum_{t=1}^T g_t^+(x_{t+1}) &\leq \sum_{i=1}^N \sum_{t=1}^T g_t^+(x_{i,t+1}) \\
&\leq \sum_{i=1}^N \left( \frac{FD}{2^{i-1}} + F^2 + \frac{D^2}{4^{i-1}} \right) \\
&\leq 2FD \left( 1 + \frac{1}{\varepsilon} \right) + F^2(1 + \log(1 + T)) + 2D^2
\end{aligned}$$

564 which proves the violation in Corollary 2.
